# Supplementary material for: The effect of postoperative oral antibiotic therapy on the incidence of postoperative endophthalmitis after phacoemulsification surgery in dogs: 368 eyes (1997–2010)
Source: PeerJ. 2021 Oct 22;9:e12305. doi: 10.7717/peerj.12305 (PMC8544250; doi:10.7717/peerj.12305)
Supplement: Supplemental Information 1 [file peerj-09-12305-s001.xlsx]

## Sheet: Yes post op Ab
Patient #	Sex	Breed	Faculty eyes	Resident eyes	Total # eyes	IOP spike OD?	IOP spike OS?	IOP spike OU?	#PMMA placed in dog	#acrylic placed in dog	#aphakic in dog	Diabetic?	Dog age?	Operative time/eye (mins)	Endopthalmitis?
104312	MC	Mix		2	2				1		1		unknown	67.5
110271	FS	Mix		2	2	Y					2		12	39.9	Yes
110478	MC	Mix	1		1	Y					1		13	75
110729	FS	Min Poodle		1	1								7	0
111689	MC	Scottie	2		2		Y				2		2	92.4
112784	MC	Cocker	2		2								4	not recorded
113669	FS	Boston	2		2			Y	2				8	27
113933	MC	Min Schnauzer		2	2			Y	2			Yes	12	62.4
114184	FS	Cocker	2		2				2				6	97.5
114411	MC	Dachsund	1		1								unknown	not recorded
114431	MC	Mix	1		1				1			Yes	9	105
114612	FS	Cavalier		2	2				2				3	67.5
116171	FS	Min Schnauzer	2		2								5	not recorded
116793	FS	Boston		2	2				2				12	90
117757	FS	Shih Tzu	2		2	Y			2				10	75
117816	MC	Mix	2		2				2				3	42
118432	F	Mix	2		2				2				9	52.5
118955	MC	Min Poodle	1	1	2								5	not recorded
119509	MC	Toy Poodle	2		2								8	not recorded
119746	FS	Labrador	2		2	Y					2	Yes	10	32.4
121054	FS	Dachsund	1		1						1	Yes	3	105
121899	FS	Cocker		1	1						1		10	64.8
122665	FS	Mix	1	1	2									not recorded
123357	MC	Cocker	1		1				1				8	79.8
123558	FS	Boston	2		2				2				7	62.4
124345	FS	Poodle	1	1	2				2				3	67.5
124471	FS	Poodle	2		2	Y					2		9	66
124641	FS	Standard Poodle	1		1	Y			1				15	120
124474	MC	Bichon		2	2		Y		2				9	60
124730	FS	Shih Tzu	1	1	2	Y					2		9	60
124744	MC	Boston	2		2			Y					8	52.5
126032	FS	Toy Poodle	2		2	Y			2				13	78
126327	FS	Shih Tzu	2		2				2				8	not recorded
126621	M	Boston		2	2				2				2	66
126780	MC	Cocker	2		2				2				5	50.1
126889	M	Mix	2		2								1	not recorded
128366	FS	Husky		2	2				2				4	90
129386	MC	Cairn		2	2			Y	2				8	42.6
129844	FS	Bichon		2	2				2			Yes	7	39.9
130512	FS	Mix	2		2			Y			2		15	51
130882	FS	Min Pin	2		2						2		4	67.5
131810	MC	Fox Terrier		2	2								5	not recorded
132330	FS	Mix		2	2		Y		2				5	90
132905	F	Cocker	2		2							Yes	9	not recorded
133107	F	Min Poodle		1	1				1				3	60
133710	FS	Min Poodle	1		1				1				9	84
134170	MC	Scottie	1		1				1				6	54
134718	FS	Min Schnauzer	2		2	Y			1		1		9	24
135768	MC	Yorkie	2		2							Yes	6	75
137560	MC	Boston		2	2		Y				2		8	51
137903	FS	Min Poodle		2	2				2				4	51
138228	FS	Toy Poodle	1	1	2	Y			1		1		6	54
138299	MC	Cocker	2		2				2				6	66
138488	FS	Tibetan Spaniel		1	1		Y				1		3	120
139267	FS	Cocker		1	1				1				4	48
139636	M	Boston	1	1	2	Y			2				2	67.5
139772	FS	Mix	2		2				2			yes	8	52.5
139946	MC	Mix		2	2		Y		1		1		4	52.5
139949	FS	Labrador		2	2		Y				2		1	82.5
140226	M	Mix		1	1						1		15	75
140520	MC	Boston		2	2	Y			2				3	50.1
140740	F	Cocker	1	1	2				1		1		6	62.4
141637	MC	Fox Terrier	2		2				1		1	yes	12	60
141868	M	Red tick hound	1	1	2				2				4	57
141872	FS	Min Poodle		2	2				2				13	52.5
142144	M	Boxer	2		2		Y		1		1		2	39.9
142689	FS	Bichon	1		1				1				6	49.8
144185	M	Fox Terrier	1		1						1		8	70.2
144226	FS	Mix	1	1	2	Y			2				1	57.6
144495	MC	Tibetan Terrier		2	2				2				4	39.9
145560	FS	Boston	1		1		Y				1		1	79.8
145983	FS	Min Poodle		2	2				2				6	62.4
146281	FS	Bichon		2	2			Y			2		13	90
146567	MC	Mix		2	2				2			Yes	9	60
146644	FS	Cocker	2		2				2				4	65.1
146665	MC	Min Schnauzer		2	2					2		Yes	10	not recorded
146879	F	Newfie	1		1						1		1	120
148298	FS	Boston		2	2					2			9	47.4
149843	MC	Min Poodle	2		2		Y		2			yes	14	62.4
150254	FS	Mix		2	2				2			Yes	6	60
150462	MC	Min Poodle		2	2				2				5	52.5
151197	M	Lhasa		2	2				2				7	67.5
151770	FS	Boston		2	2		Y			2			5	90
151775	FS	Mix		2	2				2			yes	9	82.5
151796	FS	Mix		2	2			Y			2		12	69.9
152328	M	Cocker		1	1				1				2	55.2
152432	F	Cocker		2	2				2				8	65.1
152579	M	Boston		2	2				2				9	60
152589	M	Boston	2		2		Y			1	1		12	45
152964	FS	Beagle	2		2					1	1		8	69.9
153893	FS	Yorkie		2	2		Y			2		yes	8	62.4
154008	MC	Bichon		2	2				2				3	65.1
154031	MC	Min Poodle	2		2	Y				1	1		3	65.1
155436	FS	Mix		1	1		Y			1			4	45
156693	FS	Min Schnauzer	1		1					1			11	70.2
157014	MC	Min Poodle	2		2				2			Yes	7	39.9
157407	MC	Min Schnauzer	2		2				2				10	50.1
157815	FS	Yorkie		2	2				2				6	50.1
157817	MC	Bulldog		1	1								2	not recorded
158190	MC	Bichon		2	2					1	1	Yes	9	54.9
159575	FS	Mix		1	1					1			5	45
159921	FS	Shih Tzu		1	1				1				14	70.2
161504	MC	Cocker		1	1					1			4	not recorded
161599	FS	Toy Poodle		2	2				1	1			6	52.5
162907	FS	Toy Poodle	1		1						1		unknown	70.2
164521	FS	Boston		2	2	Y				1	1		10	84.9
164558	FS	Toy Poodle		2	2							Yes	8	not recorded
164628	MC	Toy Poodle	2		2								2	not recorded
165453	MC	Bichon		1	1				1				5	55.2
165796	M	Old English Sheepdog	1	1	2	Y			2				9	60
168633	FS	Cocker		2	2				2				4	45
170316	F	Min Schnauzer		2	2			Y	2				8	35.1
F>	7		92	105	85	16	14	8	109	18	43	18	7	62.4	1
FS>	56		197		27	46							4	51
M>	12	Breeds											9	70.2
MC>	37	20	Mixed breed
Total no. dogs>	112	14	Boston
		14	Cocker
		11	Min Poodle
		7	Bichon
		7	Min Schnauzer
		7	Toy poodle
		4	Shih Tzu
		3	Fox Terrier
		3	Yorkie
		2	Dachsund
		2	Labrador
		2	Poodle
		2	Scottie
		1	Beagle
		1	Boxer
		1	Bulldog
		1	Cairn
		1	Cavalier
		1	Husky
		1	Lhasa Apso
		1	Miniature Pinscher
		1	Newfoundland
		1	Old Eng Sheepdog
		1	Red Tick Hound
		1	Standard poodle
		1	Tibetan Spaniel
		1	Tibetan Terrier
		112

## Sheet:  No post op Ab
Patient #	Sex	Breed	Faculty eyes	Resident eyes	Total # eyes	IOP spike OD?	IOP spike OS?	IOP spike OU?	#PMMA placed in dog	#acrylic placed in dog	#aphakic in dog	Diabetic?	Dog age?	Operative time/eye (mins)	Endophthalmitis?
113951	FS	Boston	2		2			Y			2	no	10	55
141514	FS	Min Poodle		2	2				2			yes	13	60
142699	F	Dalmatian	2		2				1		1	yes	8	52.5
148494	FS	MBD		2	2		Y				2	no	2	85
148962	MC	MBD		2	2						2	yes	11	67.5
150081	M	Labrador	1		1						1	no	2	60
151777	FS	Golden	1		1		Y		1			no	7	40
151994	FS	MBD	2		2					2		yes	5	52.5
152328	M	Cocker	1		1					1		no	4	90
153190	FS	MBD		2	2					1	1	no	2	42.5
154877	MC	Yorkie		1	1						1	no	11	60
156045	MC	Boston		2	2	Y				1	1	no	10	47.5
156169	MC	Labrador	2		2				1	1		yes	9	77.5
157677	FS	Cocker	2		2					1	1	yes	14	52.5
158194	MC	Shih Tzu	2		2				1	1		yes	8	55
160095	FS	Cocker	1		1	Y			1			no	11	40
160460	F	Cocker	1		1				1			no	2	80
160475	FS	Boston	1		1						1	no	10	70
160738	FS	MBD	2		2			Y		2		no	8	72.5
160846	FS	Toy Poodle	1		1					1		no	3	70
160979	F	Boston	2		2				2			no	3	72.5
163563	FS	Yorkie	2		2				2			no	7	not recorded
163968	F	MBD	2		2						2	no	unknown	50
165453	MC	Bichon		1	1				1			no	6	40
165984	MC	Jack Russell		2	2				2			no	11	75
166299	FS	Boston	2		2				1		1	no	2	not recorded
167096	MC	Boston	1		1				1			no	12	not recorded
167197	fs	Dachsund	1	1	2				2			Yes	8	90
168343	MC	Labrador	2		2	Y			2			yes	7	62.5
168513	F	Labrador	2		2					2		no	1	55
168725	M	Maltese		1	1				1			no	4	not recorded
170537	FS	MBD	1		1				1			no	8	not recorded
170538	MC	Jack Russell	2		2				1		1	no	4	45
170966	FS	Cocker	0	1	1				1			No	5	not recorded
173801	M	Boston	2		2			Y	2			no	9	77.5
174217	FS	Bichon	1	1	2			Y	2			no	7	45
175502	FS	Min Schnauzer	0	2	2				2	0	0	yes	6	not recorded
177754	FS	Jack Russell	0	1	1				1	0	0	no	5	160
180497	FS	Boston	1	1	2				2	0	0	no	10	not recorded
181004	MC	MBD	1	1	2	Y			1		1	yes	12	not recorded	Yes
179991	MC	Min Poodle	0	2	2				2	0	0	yes	7	30
179738	MC	min Schnauzer	0	2	2		Y		2	0	0	yes	14	not recorded
180666	FS	toy poodle	0	1	1				0	0	1	no	9	120
177616	FS	bichon	1	0	1				1	0	0	no	7	30
180211	mc	Yorkie	2	0	2				2	0	0	yes	12	52.5
176811	mc	MBD	2	0	2				2	0	0	no	5	47.5
181929	mc	Min Schnauzer	0	2	2				0	0	2	no	1	82.5
182580	mc	MBD	1	0	1				1	0	0	no	5	70
182375	FS	Jack Russell	1	1	2				2	0	0	yes	6	70
180666	FS	Min Poodle	0	1	1				1	0	0	no	9	130
180666	FS	Min Poodle	0	1	1				0	0	1	no	9	80
183163	FS	Husky	0	2	2				2	0	0	no	1	112.5
183423	MC	Min Pin	1	1	2				2	0	0	yes	7	65
184376	FS	Golden	0	1	1				1	0	0	no	2	50
184616	FS	Bichon	1	0	1	Y			1	0	0		7	30
184961	FS	Min Schnauzer	1	1	2				1	0	1	no	3	65
183888	FS	MBD	1	1	2				1	1	0	no	2	62.5
170282	FS	MBD	0	1	1		Y		1	0	0	no	4	70
170282	F	Cocker	0	1	1	Y			1	0	0	no	4	55
179813	MC	Min Schnauzer	0	1	1				1	0	0	no	4	60
186332	MC	Toy poodle	0	2	2		Y		1	0	1	no	11	65	Yes
181714	fs	toy poodle	0	2	2				2	0	0	no	6	42.5
187256	mc	bichon	1	1	2				2	0	0	no	4	60
187020	fs	Boston	1	1	2		Y		2	0	0	no	11	67.5
187613	mc	Boston	0	2	2	Y			1	0	1	no	3	50
187878	mc	MBD	1	1	2		Y		0	2	0	no	13	75
187469	mc	Lhasa	1	1	2				2	0	0	yes	7	67.5
188722	mc	toy poodle	1	1	2				2	0	0	no	3	62.5
188411	fs	min poodle	1	1	2		Y		2	0	0	no	3	77.5
189069	MC	Boston	1	1	2				2	0	0	no	9	65
186969	FS	Cavalier	1	0	1				1	0	0	no	5	50
180839	FS	Pekingese	1	1	2		Y		2	0	0	no	9	100
167879	F	Jack Russell	1	1	2				2	0	0	no	11	85
190565	F	Min Schnauzer	1	1	2				2	0	0	no	4	70
189867	FS	Boston	1	1	2				2	0	0	no	1	52.5
191440	MC	cocker	1	1	2				2	0	0	no	5	50
192097	FS	Min Poodle	1	0	1				1	0	0	no	3	75
179476	MC	Min Pin	1	1	2				2	0	0	no	10	80
192159*	MC	Boston	1	1	2				2	0	0	no	7	50
193344	FS	Golden	0	1	1				1	0	0	no	2	55
194996	MC	Cocker	1	1	2				2	0	0	no	4	42.5
195677	FS	Boston	0	2	2		Y		2	0	0	no	11	57.5
194201	FS	MBD	1	1	2	Y			2	0	0	yes	11	50
196042	FS	Yorkie	1	0	1				1	0	0	no	6	90
196042	FS	Yorkie	0	1	1				1	0	0	no	6	65
193470	FS	shih tzu	0	1	1				1	0	0	no	10	70
191666	MC	bichon	1	1	2				2	0	0	no	4	62.5
195562	MC	MBD	0	2	2				1	0	1	no	9	60
197509	F	Jack Russell	0	1	1		Y		1	0	0	no	6	90
196490	FS	MBD	0	2	2	Y			2	0	0	no	11	45
197777	FS	Silky Terrier	1	0	1				0	0	1	no	5	115
198764	FS	toy poodle	0	1	1		Y		0	0	1	no	13	165
198375	FS	American Eskimo	1	1	2	Y			2	0	0	yes	12	87.5
198492	FS	Westie	0	2	2				0	2	0	no	8	112.5
199381	FS	Aussie	0	1	1				0	1	0	no	4	105
200318	MC	rat terrier	1	1	2		Y		2	0	0	yes	9	45
201148	M	Labrador	1	1	2				2	0	0	yes	11	37.5
202199	MC	Beagle	1	1	2		Y		2	0	0	yes	5	42.5
201623	FS	Golden	0	1	1	Y			0	1	0	no	4	50
200589	FS	Cavalier	1	1	2				0	2	0	no	6	55
203410	MC	English Springer	1	1	2		Y		0	2	0	yes	6	50
203709	MC	Toy Poodle	1	1	2				0	2	0	no	11	70
203754	FS	Boston	1	1	2	Y			2	0	0	no	11	75
F>	9		83	88	68	12	15	4	117	26	28	23	7	62.5	2
FS>	53		171		35	35							4	50
M>	5	Breeds											10	75
MC>	36	16	Mixed Breed
Total no. dogs>	103	15	Boston Terrier
		8	Cocker
		6	Min Poodle
		7	Toy poodle
		6	Min Schnauzer
		6	Bichon
		5	Jack Russell
		5	Labrador
		5	Yorkie
		4	Golden
		0	Pug
		2	Cavalier
		2	Miniature Pinscher
		1	Rat Terrier
		1	Dachsund
		1	Dalmatian
		1	Husky
		1	Maltese
		1	Pekingese
		2	Shih Tzu
		1	Aussie
		1	Westie
		0	Corgi
		0	English Setter
		0	Standard Poodle
		1	English Springer
		1	Beagle
		1	Silky Terrier
		1	American Eskimo
		1	Lhasa
		1	Maltese
		103
